# Supplementary material for: Rapid colorimetric loop-mediated isothermal amplification for hypersensitive point-of-care Staphylococcus aureus enterotoxin A gene detection in milk and pork products
Source: PubMed Central journal article supplement (PMC7211006; doi:10.1038/s41598-020-64710-0), 2020-05-08
Supplement: 41598_2020_64710_MOESM1_ESM.pdf [file 41598_2020_64710_MOESM1_ESM.pdf]

**Rapid colorimetric loop-mediated isothermal amplification for hypersensitive point-of-care *Staphylococcus aureus* enterotoxin A gene detection in milk and pork products**

Grittaya Srimongkol<sup>a</sup>, Boonsong Ditmangklo<sup>b</sup>, Ilada Choopara<sup>a</sup>, Jiraporn Thaniyavarn<sup>c</sup>, Deborah Dean<sup>d,e,f</sup>, Sirirat Kokpol<sup>b</sup>, Tirayut Vilaivan<sup>b</sup>, and Naraporn Somboonna<sup>c\*</sup>

**Supplementary Figures and Tables**

**Supplemental Figure 1.** Incubation periods and temperatures of (A-C) Goto's and (D-F) our LAMPs.

In (A and D) incubation temperature was at 60 °C, (B and E) 63 °C, and (C and F) 65 °C. Lane M represents 100 bp DNA ladder (GeneDireX Inc., Miaoli County, Taiwan); N, negative control; 1-4, incubation period at 15, 30, 45 and 60 min, respectively. (Original photographs of A-C is in Supplementary Information).

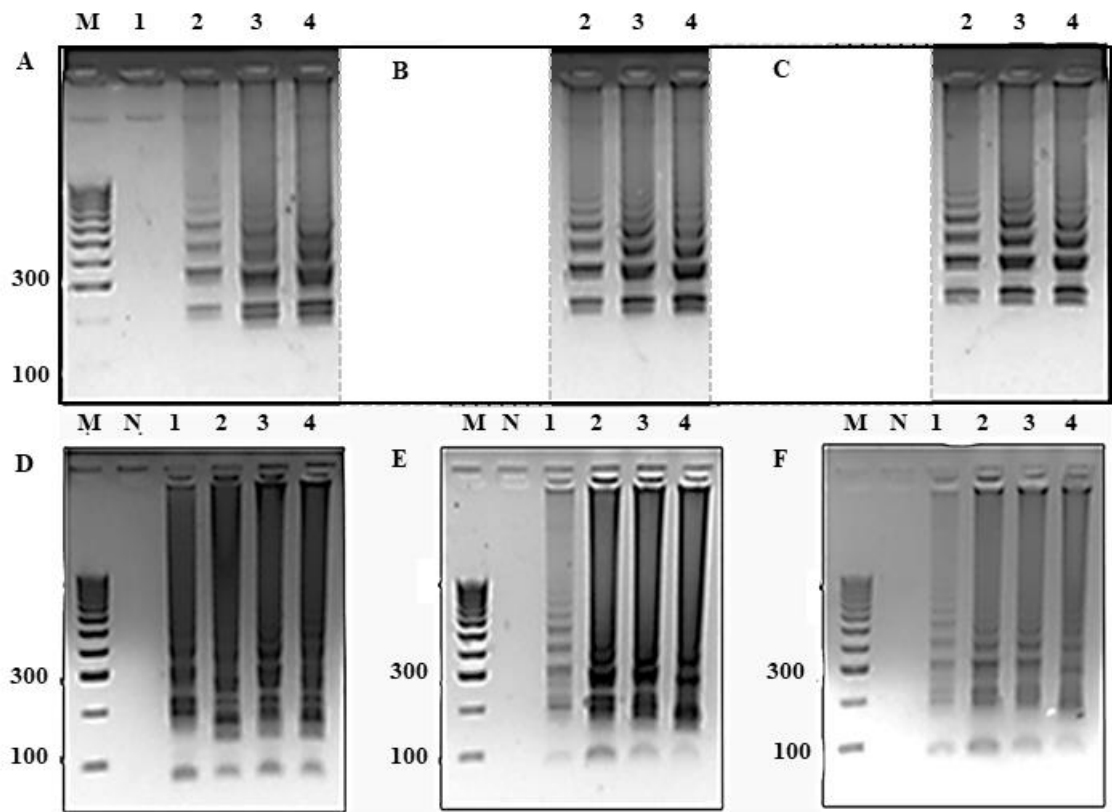

**Supplemental Figure 2.** Optimized ratios of LAMP-to-AuNP volume for optimal color contrast between positive (red) and negative (purple/blue/gray) test results, determined by visualization and spectrophotometer at 400-700 nm absorbance. An optimal ratio was 5:5 LAMP:AuNP.

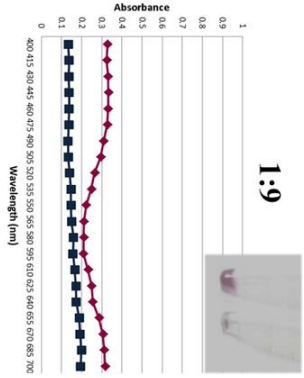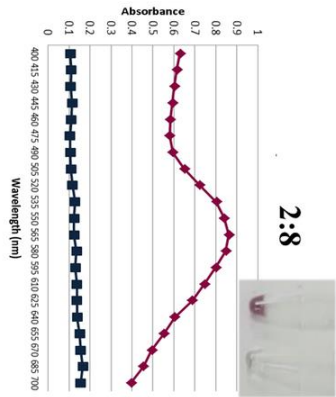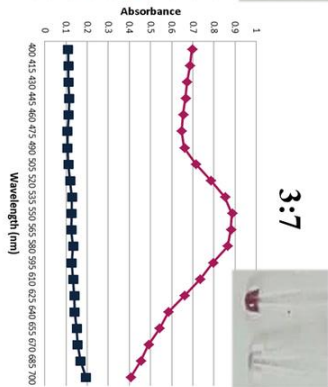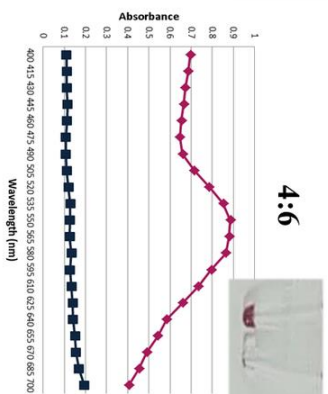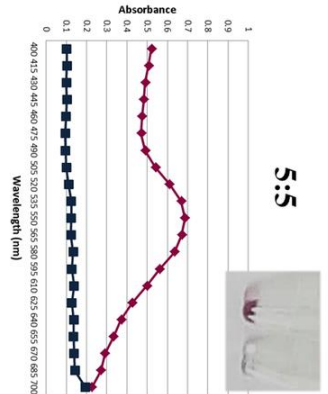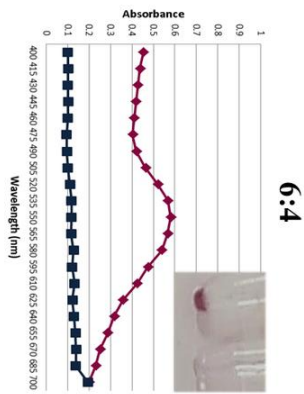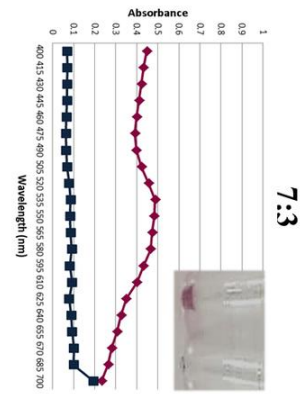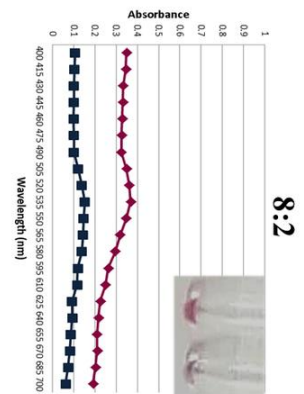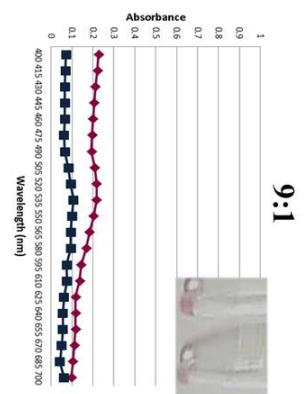

**Supplemental Table 1.** Bacterial strains.

| <i>Bacteria species</i>             | <i>Strain numbers</i> | <i>Sources</i>                                                                          |
|-------------------------------------|-----------------------|-----------------------------------------------------------------------------------------|
| <i>Staphylococcus aureus (sea)</i>  | ATCC13565             | <i>Department of Microbiology,<br/>Faculty of Science, Chulalongkorn<br/>University</i> |
| <i>Staphylococcus aureus</i>        | ATCC25928             |                                                                                         |
| <i>Staphylococcus aureus</i>        | ATCC144925            |                                                                                         |
| <i>Staphylococcus aureus (sea)</i>  | ATCC25923             | <i>Department of Medical Sciences,<br/>Ministry of Public Health</i>                    |
| <i>Staphylococcus epidermidis</i>   | ATCC12228             |                                                                                         |
| <i>Staphylococcus saprophyticus</i> | ATCC15305             |                                                                                         |
| <i>Vibrio funissii</i>              | N/A*                  | <i>Bamrasnaradura Infectious<br/>Diseases Institute, Ministry of<br/>Public Health</i>  |
| <i>Shigella flexneri</i>            | N/A                   |                                                                                         |
| <i>Escherichia coli</i>             | ATCC25922             |                                                                                         |
| <i>Escherichia coli</i>             | ATCC35218             |                                                                                         |
| <i>Salmonella typhimurium</i>       | ATCC14026             |                                                                                         |
| <i>Enterobacter cloacae</i>         | N/A                   |                                                                                         |
| <i>Aeromonas sobria</i>             | N/A                   |                                                                                         |
| <i>Enterococcus faecalis</i>        | N/A                   |                                                                                         |

\* N/A represents information on ATCC number that is not available, because strain was isolated and sequenced to identify species at local source.

**Supplemental Table 2.** Oligonucleotide primer and probe sequences.

| <i>Reaction</i>                        | <i>Primer and probe names</i> | <i>Sequences (5' - 3')</i>                                        |
|----------------------------------------|-------------------------------|-------------------------------------------------------------------|
| <i>PCR</i> <sup>30</sup>               | <i>SEA-F</i>                  | <i>TTGGAAACGGTTAAAACGAA</i>                                       |
|                                        | <i>SEA-R</i>                  | <i>GAACCTTCCCATCAAAAACA</i>                                       |
| <i>Goto et al.'s LAMP</i> <sup>2</sup> | <i>SEA_FIP</i>                | <i>GATCCAACCTCCTGAACAGTTACAATACAGTACCTTTGGAA<br/>ACG</i>          |
|                                        | <i>SEA_BIP</i>                | <i>CTGATGTTTTTGGTGGGAAGGTTCCCGAAGGTTCTGTAGA<br/>AGT</i>           |
|                                        | <i>SEA_F3</i>                 | <i>TCAATTTATGGCTAGACGGT</i>                                       |
|                                        | <i>SEA_B3</i>                 | <i>CTGAGCACCAAATAAATCG</i>                                        |
|                                        | <i>SEA_LB</i>                 | <i>AGAGGGGATTAATCGTGTTCA</i>                                      |
| <i>Our LAMP</i>                        | <i>Sa_SEA FIP</i>             | <i>CTGTAAAAAAGCCTTTAAACAATATTTTGCTAAAACTGAAA<br/>ATAAAGAGAGTC</i> |
|                                        | <i>Sa_SEA BIP</i>             | <i>GGTATAACGATTTATTAGTAGATTTTTTATACAAGTCTACTTT<br/>TTCCCTT</i>    |
|                                        | <i>Sa_SEA F3</i>              | <i>TCTATTATTACAATGAAAA</i>                                        |
|                                        | <i>Sa_SEA B3</i>              | <i>ATTGATAACCATAATAAGCA</i>                                       |
|                                        | <i>Sa_SEA LF</i>              | <i>TGCTAGTTAAAAATGTCGTATGAT</i>                                   |
|                                        | <i>Sa_SEA LB</i>              | <i>GATTCAAAGGATATTGTTGAT</i>                                      |
| <i>Our LAMP-<br/>AuNP</i>              | <i>Probe-Sa_SEA</i>           | <i>HS-AGGCTTTTTTACA(G/A)ATCATTC</i>                               |

## Supplementary Information

Supplementary Information 1. Original photographs of Supplemental Figure 1A, 1B and 1C

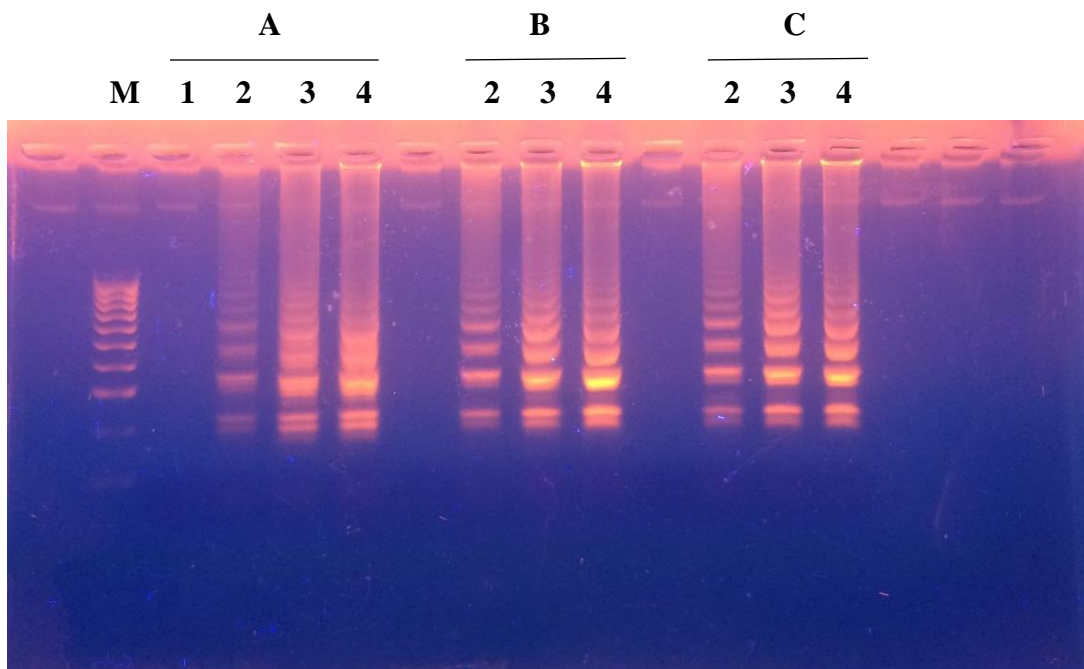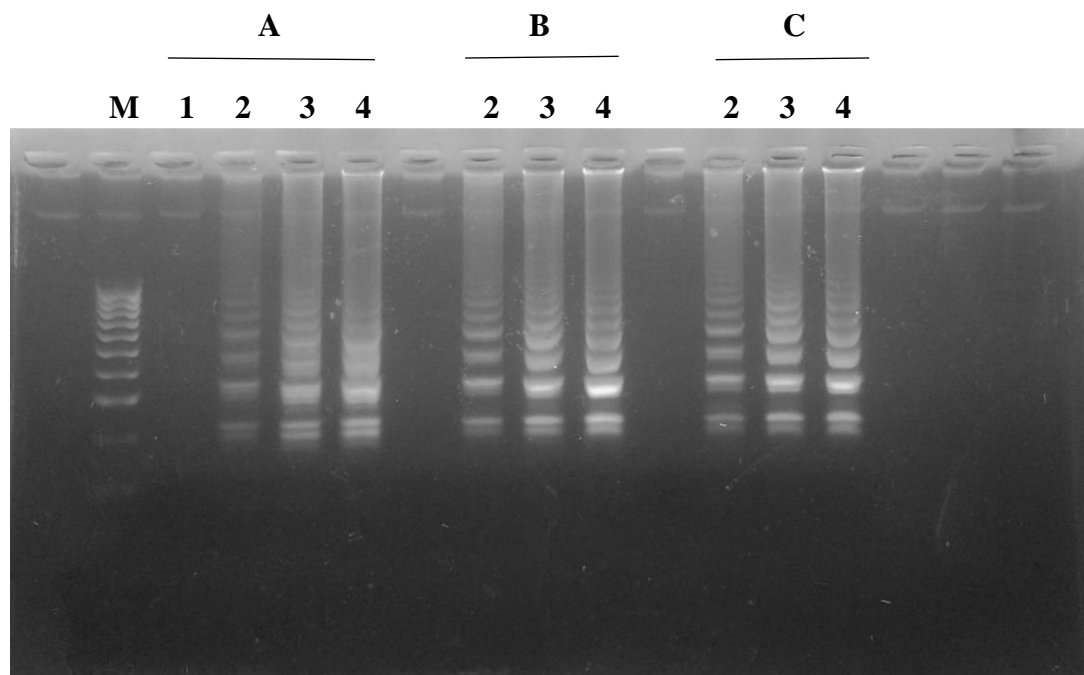

## Supplementary Information 2. Synthesis of STR dye

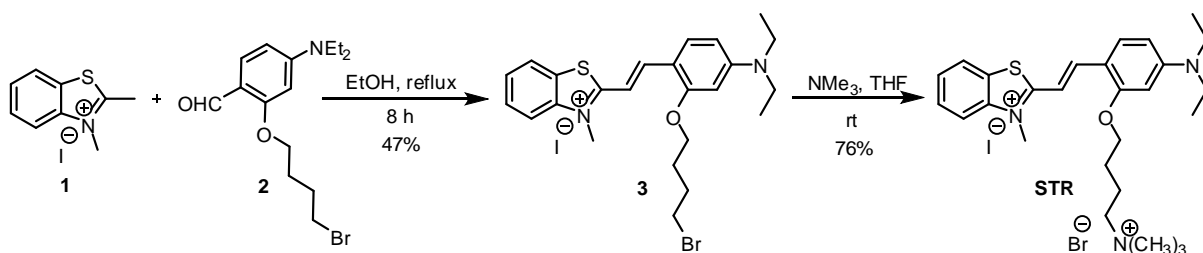

A sample of 2,3-dimethyl-1,3-benzothiazol-3-ium iodide (**1**) (80 mg, 0.3 mmol) and 2-(4-bromobutoxy)-4-(diethylamino)-benzaldehyde (**2**) (200 mg, 0.6 mmol)<sup>39</sup> was refluxed in absolute ethanol for 8 h. The precipitate formed was recrystallized from ethanol to give the intermediate **3** as a gray solid (78 mg, 47%): <sup>1</sup>H NMR (400 MHz, DMSO-d<sub>6</sub>): δ = 8.20 (d, J = 7.4 Hz, 1H), 8.08 (d, J = 14.5 Hz, 1H), 8.00 (d, J = 8.0 Hz, 1H), 7.90 (d, J = 9.2 Hz, 1H), 7.73 (t, J = 7.7 Hz, 1H), 7.62 (t, J = 7.25 Hz, 1H), 7.48 (d, J = 15.1 Hz, 1H), 6.51 (d, J = 8.74 Hz, 1H), 6.20 (s, 1H), 4.20 (t, J = 6.0 Hz, 2H), 4.11 (s, 3H), 3.65 (t, J = 6.3 Hz, 4H), 3.54 (m, 4H), 3.40 (t, J = 6.6 Hz, 1H), 2.00 (m, 4H), 1.15 (t, J = 6.9 Hz, 6H)

Trimethylamine (1 mL, 5 mmol) was added to a solution of **3** (30 mg, 0.05 mmol) in tetrahydrofuran (2 mL) and the reaction was stirred for 30 h at room temperature. The reddish-purple precipitate was filtered to give the dye **STR** (30 mg, 76%): <sup>1</sup>H NMR (400 MHz, DMSO-d<sub>6</sub>): δ = 8.22 (d, J = 7.4 Hz, 1H), 8.10 (d, J = 14.5 Hz, 1H), 8.02 (d, J = 8.00 Hz, 1H), 7.90 (d, J = 9.2 Hz, 1H), 7.73 (t, J = 7.7 Hz, 1H), 7.62 (t, J = 7.2 Hz, 1H), 7.48 (d, J = 15.1 Hz, 1H), 6.51 (d, J = 8.7 Hz, 1H), 6.20 (s, 1H), 4.20 (t, J = 6.0 Hz, 2H), 4.11 (s, 3H), 3.51 (m, 4H), 3.44 (m, 2H), 3.09 (s, 9H), 1.89 (m, 4H), 1.15 (t, J = 6.9 Hz, 6H)

The dye **STR** exhibited maximum absorption at 525 nm and emission at 591 nm and the fluorescence emission increased by more than 18-fold in the presence of DNA.
